# Supplementary material for: Loss of vascular endothelial notch signaling promotes spontaneous formation of tertiary lymphoid structures
Source: PubMed Central journal article supplement (PMC9018798; doi:10.1038/s41467-022-29701-x), 2022-04-19
Supplement: 41467_2022_29701_MOESM1_ESM.pdf [file 41467_2022_29701_MOESM1_ESM.pdf]

**A**

mRNA rel. fold change  
Ctrl  
*Rbpj<sup>ΔEC</sup>*  
 $p=0.013$

**B**

TdTomato CD31 DAPI  
TdTomato CD31 DAPI

**C**

Live cells  
PI  
CD45  
CD3  
CD31  
CD3  
CD144  
— EC  
— T cells  
— B cells

**D**

Live/Singlette/CD45<sup>+</sup>  
T/NK/Gran  
B220  
CD11c  
CD19  
B220  
CD43  
CD24  
IgM  
PrePro B cells  
CD24  
IgM  
Pro B cells  
CD24  
IgM  
Immature B cells  
CD24  
CD23  
Splenic MZ B cells  
CD23  
IgM  
Transient B cells  
CD24  
CD21/35  
Follicular B cells  
CD23

**E**

Kidney  
Liver  
Peripheral blood  
LN  
Spleen  
Bone marrow  
% of live  
Ctrl  
*Rbpj<sup>ΔEC</sup>*  
 $p=0.012$   
 $p=0.016$   
 $p=0.005$   
immB MZB Trans B IgM<sup>neg</sup>IgD<sup>hi</sup>CD23<sup>CR</sup> pre B IgM<sup>neg</sup>IgD<sup>hi</sup>FoL B B220<sup>hi</sup>CD19<sup>neg</sup>CD24<sup>hi</sup>CD43<sup>var</sup> pro B PreProb

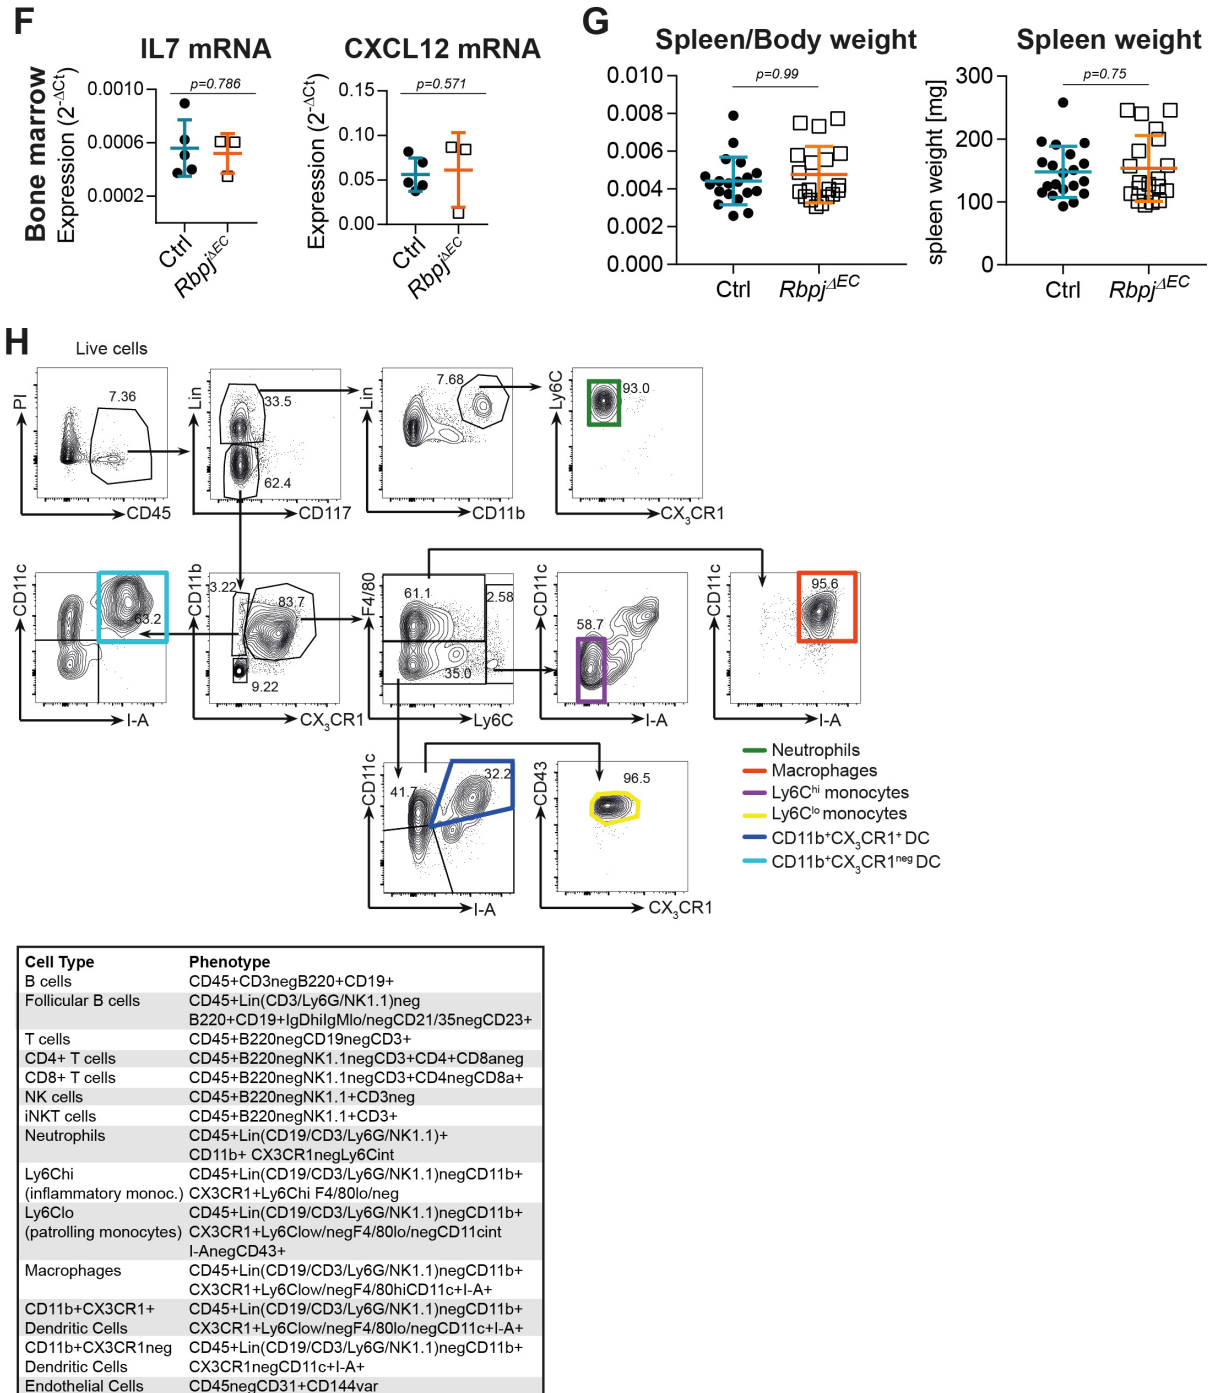

**Supplementary Figure 1.** Analysis of renal targeting and cell populations after endothelial-specific loss of Notch signaling

**A)** Recombination control: upper panel, Whole kidney mRNA expression of *Hey1*, downstream of *Rbpj*, as internal control of endothelial *Rbpj* knockdown. CTRL n=9, *Rbpj*<sup>AEC</sup> n=6, \*  $p<0.05$  (Mann-Whitney test, two-tailed, exact  $p=0.013$ ) Graph: Scatter dot blot with mean and SD (whiskers).

Lower panel, left side, kidney PCR for *Rbpj* deletion band (at 500bp, only upon successful deletion of exons 6 and 7). **B)** *Cdh5Cre*<sup>ERT2</sup>;*TdTomato*<sup>fl/fl</sup> mouse model as recombination control: nuclear and cytoplasm TdTomato (yellow and middle column)

and CD31 staining (cytoplasmatic, purple and right column) show good recombination; exemplary image, kidney sections from n=3 mice stained. Scale bars, 50µm. **C)** Flow cytometry gating strategy for Endothelial cells, B and T lymphocytes. **D)** Flow cytometry gating strategy for B cell subset and progenitor panel. **E)** Flow cytometry of B cell subpopulations in kidney, liver, blood, lymph node, spleen and bone marrow. Follicular B cells (green shade) significantly upregulated in kidney (p=0.012) and liver (p=0.016). Marginal zone B cells (red shade) slightly lower in *Rbpj<sup>ΔEC</sup>* spleen (p=0.005). No other significant change between groups observed. Box plots with mean, 25-75 percentile (bounds) and min/max (whiskers). Two-tailed Mann Whitney test. **F)** Bone marrow mRNA expression of IL7 (p=0.786) and CXCL12 (p=0.571) between groups; Mann-Whitney test, two-tailed; scatter dot blot with mean and SD (whiskers), CTRL n=5, *Rbpj<sup>ΔEC</sup>* n=3. **G)** Spleen weight (p=0.99) and spleen/body weight ratio (p=0.75) in Ctrl and *Rbpj<sup>ΔEC</sup>*; Scatter dot blots with mean, SD (whiskers); two-tailed Mann-Whitney test; CTRL n=20, *Rbpj<sup>ΔEC</sup>* n=19. **H)** Flow cytometry gating strategy for Myeloid panel. Table, list of markers used for each cell type. Source data are provided with this paper.

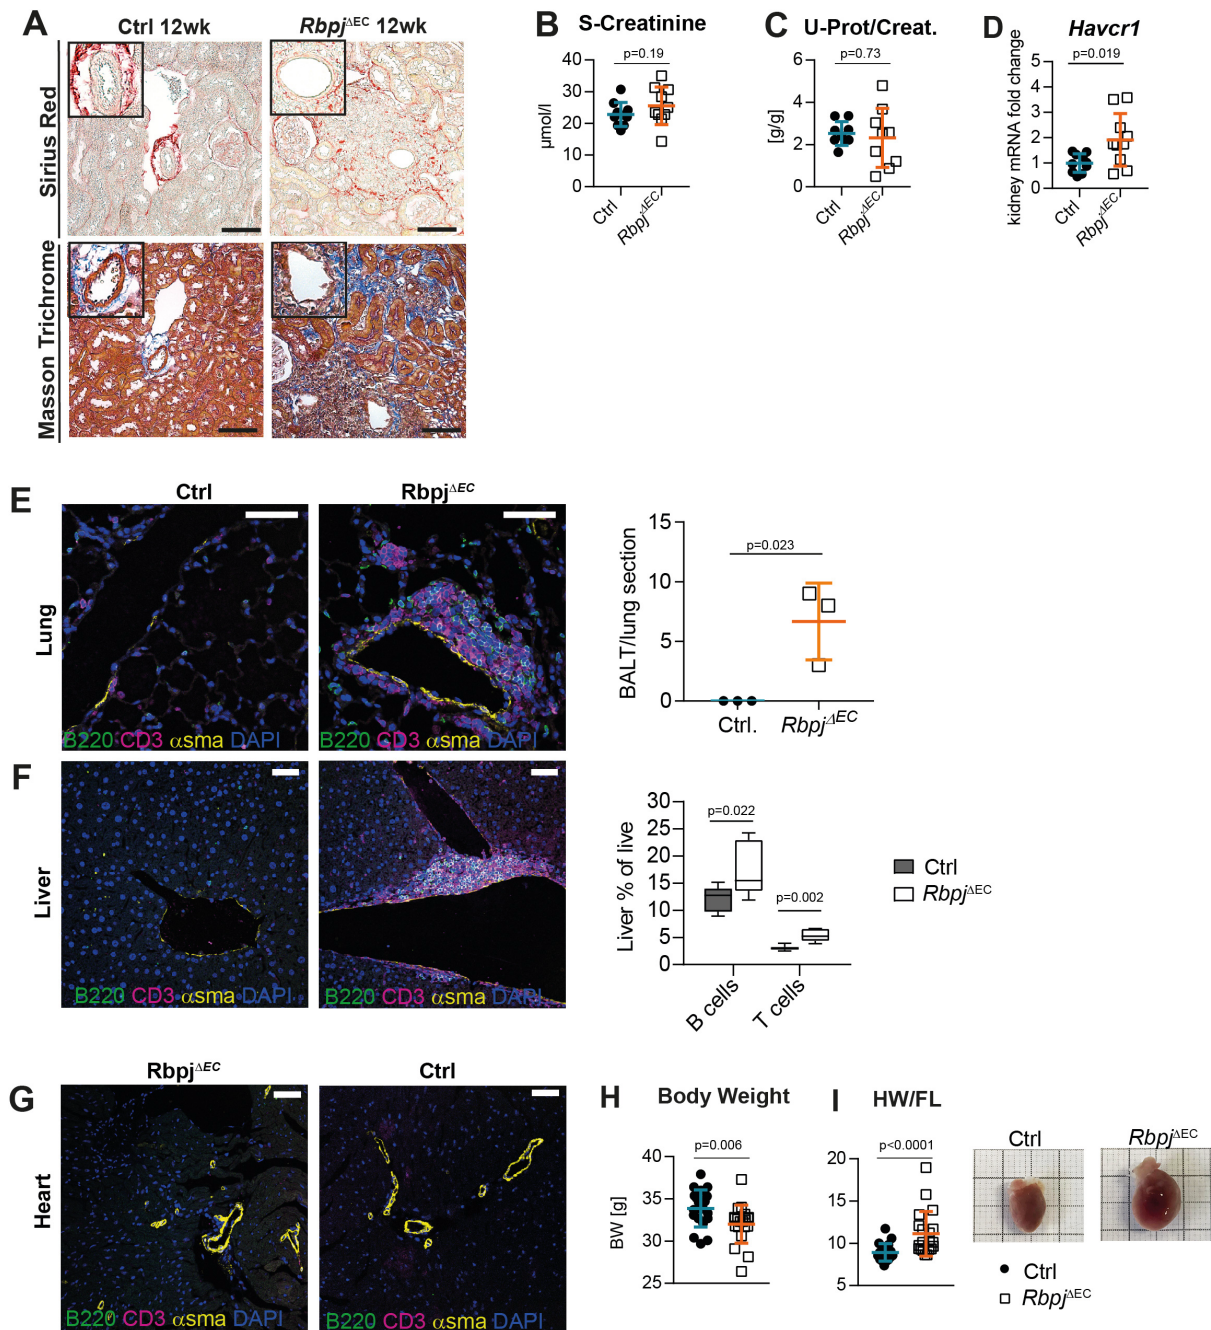

**Supplementary Figure 2: Renal and cardiac parameters in Rbpj-mutant mice.**

**A)** Sirius red (upper panel) and Masson trichrome (lower panel) staining of Ctrl (left) and *Rbpj*<sup>ΔEC</sup> kidneys (right). Insets, arterial cross section. Scale bar, 50μm. Exemplary images, kidneys from n=5 mice/group were stained. **B)** Serum creatinine, n= 10 mice/group, scatter dot blot with mean, SD (whiskers), Mann-Whitney test, two-tailed,  $p=0.19$ , **C)** Urine protein to creatinine ratio between groups. n= 10 mice/group, scatter dot blot with mean, SD (whiskers), Mann-Whitney test, two-tailed,  $p=0.73$  **D)** Whole kidney mRNA *Havcr1* (Kim1) expression, n= 10 mice per group from 2 independent experiments, scatter dot blot with mean, SD (whiskers),  $p=0.019$  (Mann-Whitney test, two-tailed).



**E)** Immunofluorescence costaining of B220 (green), CD3 (purple) and  $\alpha$ sma (yellow) of Ctrl and *Rbpj<sup>ΔEC</sup>* lungs. Scale bars, 50 $\mu$ m. Quantification: average number of TLS counted per lung section, each data point represents one animal (n=3 mice per group), scatter dot blot with mean, SD (whiskers), Unpaired Student's t-test, two-sided, p=0.0229, \*p<0.05. **F)** Immunofluorescence costaining of B220 (green), CD3 (purple) and  $\alpha$ sma (yellow) of Ctrl and *Rbpj<sup>ΔEC</sup>* liver. Scale bars, 50 $\mu$ m. Right, quantification via flow cytometry staining, % of live. N= 5 mice per group. Mean, Box from 25.-75. Percentile, whiskers represent min/max. B-cells, p=0.022; T-cells, p=0.002, Mann-Whitney Test, two-tailed.

**G)** Immunofluorescence costaining of B220 (green), CD3 (purple) and  $\alpha$ sma (yellow) of Ctrl and *Rbpj<sup>ΔEC</sup>* hearts, exemplary pictures, no quantification, representative of n=5/group. Scale bar = 50 $\mu$ m. **H)** Body weight (n=20/group, p=0.0062) and **I)** heart weight to femur length ration (HW/FL), (n=20/group, p<0.0001) in 20-22 weeks old mice (12 weeks after Tamoxifen injection). H&I: Mann-Whitney test, two-tailed. Graphs: Scatter dot blot with mean and SD (whiskers). Source data are provided with this paper.

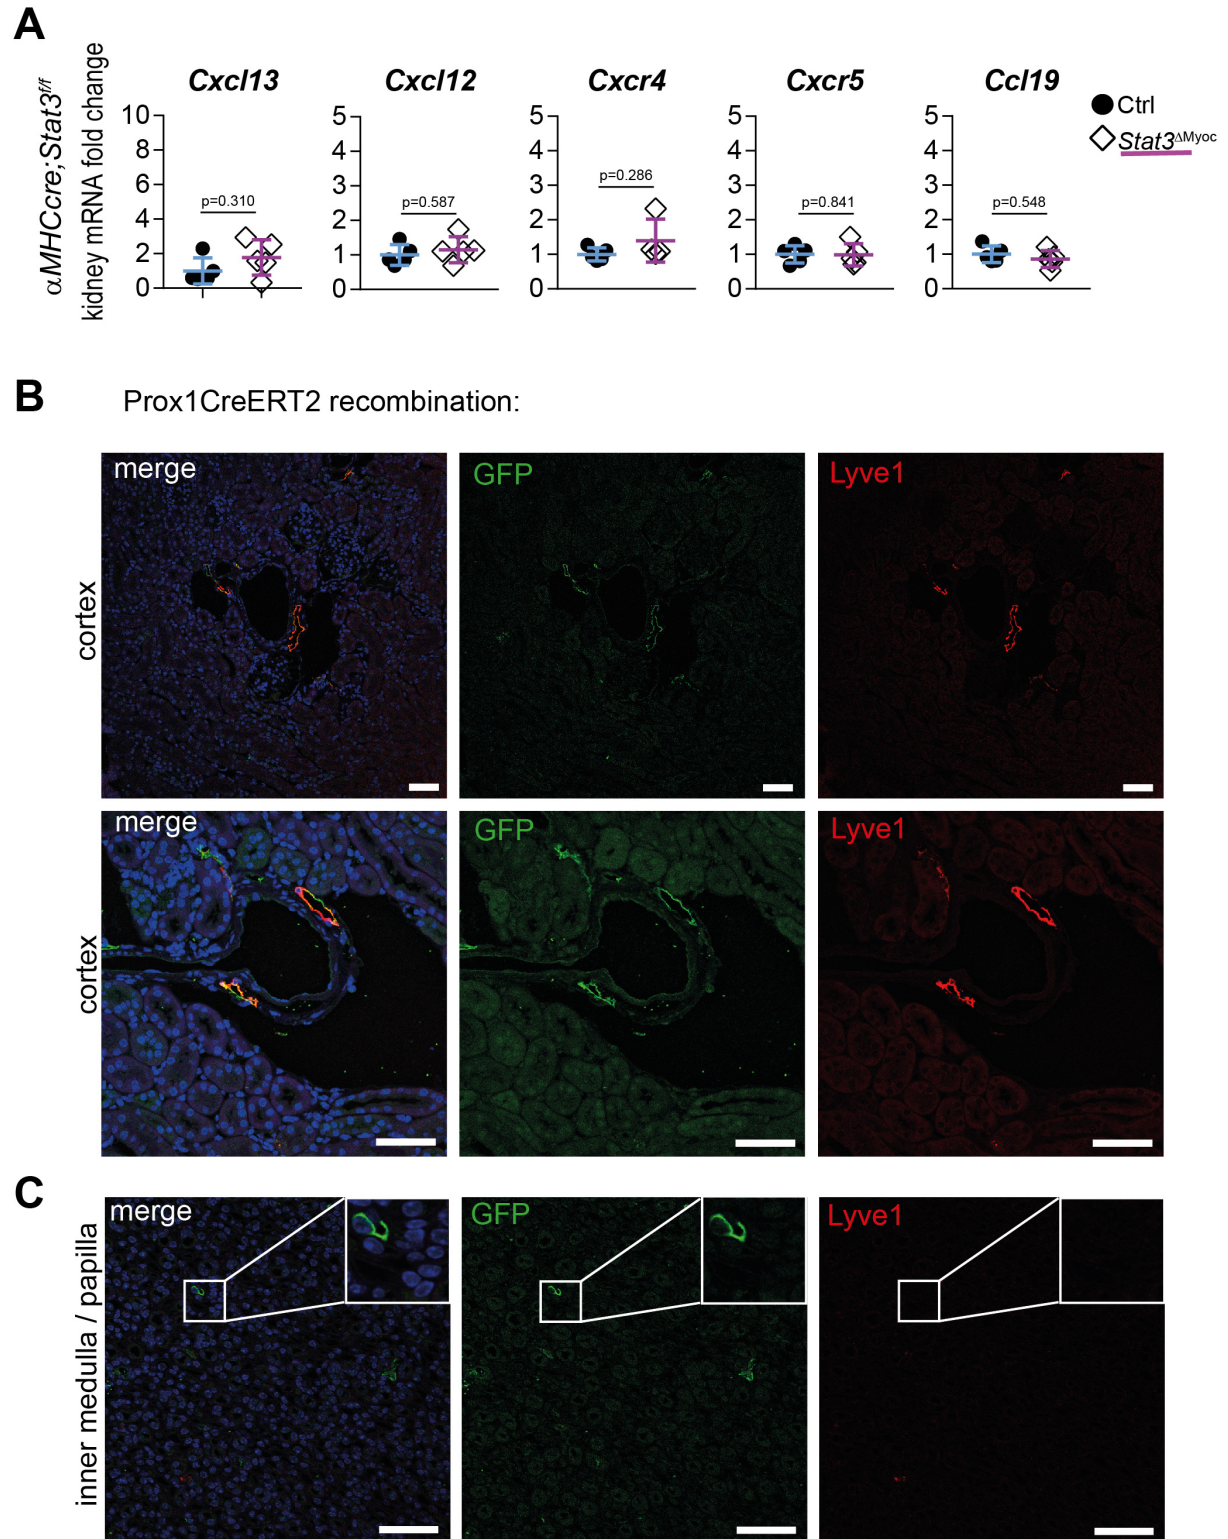

**Supplementary Figure 3:** Gene / transgene expression in Stat3  $\Delta$ Myoc and Prox1Cre<sup>ERT2</sup> recombination control kidneys

**A)** Kidney mRNA expression of Cxcl13 (p=0.310), Cxcl12 (p=0.587), Cxcr4 (p=0.286), Cxcr5 (p=0.841) and Ccl19 (p=0.548) in Stat3 $\Delta$ Myoc vs. Control. N=5/group. Scatter dot

plots with mean and SD (whiskers), two-tailed Mann Whitney test. Experiment repeated 2x with similar results. Source data are provided with this paper.

**B** and **C**: Recombination control of *Prox1Cre<sup>ERT2</sup>* expression in adult mouse kidney (*Prox1Cre<sup>ERT2</sup>;mTmG* mouse model). Prox1-GFP in green, Lyve1-costaining in red. Exemplary pictures, several sections on different levels of the kidney were stained from n=2 mice. **A**) cortex area; **B**) inner medulla/papilla area. All scale bars 50µm.

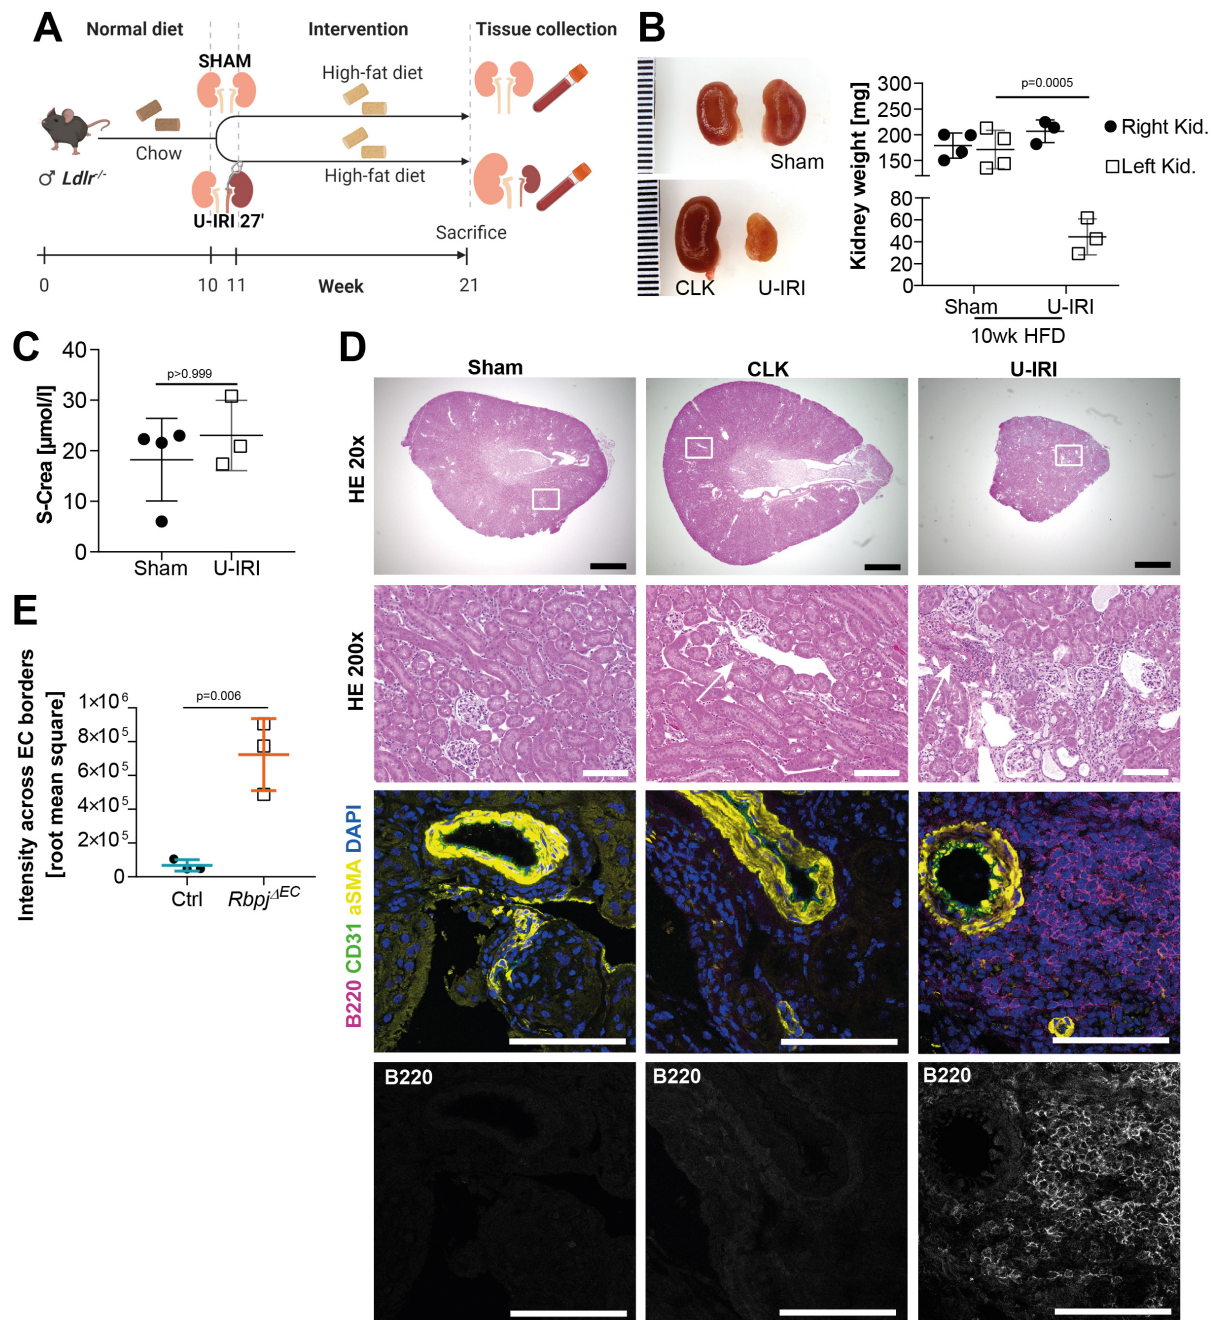

**Supplementary Figure 4:** Inflammatory kidney damage model using unilateral IRI and high fat diet. **A)** Sketch of experimental protocol. 4A-D, n=4 Ctrl, n=3 U-IRI. **B)** Kidneys of Sham and U-IRI mice, mm-scale on left. Right panel, kidney weight in mg. Scatter dot plot with mean and SD (whiskers), \*\*\*  $p=0.0005$ , Multiple T tests, Two-stage linear step-up procedure of Benjamini, Krieger and Yekutieli, with  $Q = 1\%$ . **C)** serum creatinine, scatter dot blot, mean, SD (whiskers).  $P=0.99$ , two-tailed Mann Whitney test. **D)** HE (upper panels; arrow, arterial lumen) and B220 CD31 αSMA immunofluorescence costaining (third panel, lowest panel B220 channel only) in



Sham, contralateral kidney and U-IRI kidney. Representative images of n=4 Sham mice and n=3 CLK/U-IRI kidneys. Scale bars: Black bar, 1mm; white bars 100 $\mu$ m.

**E)** Referring to figure 4: Quantification of PNAd staining on kidney endothelium; root mean square of greyscale intensity values across EC borders. Scatter dot plot with mean and SD (whiskers). n=3 mice/group, p=0.0063. Source data are provided with this paper.

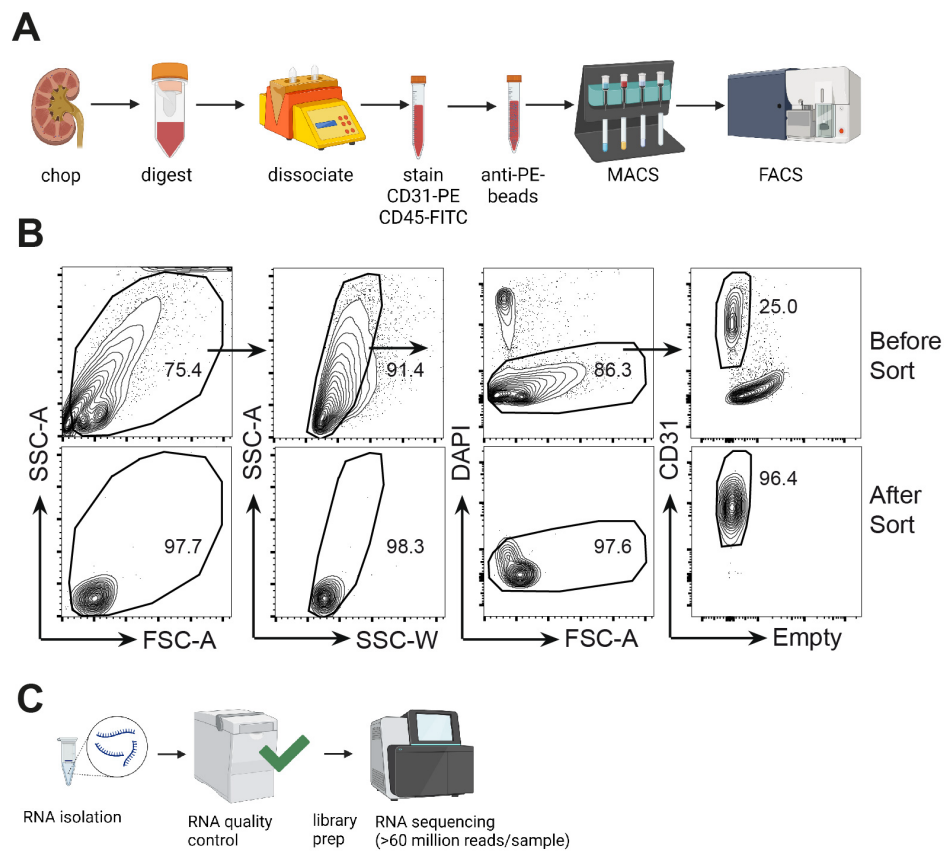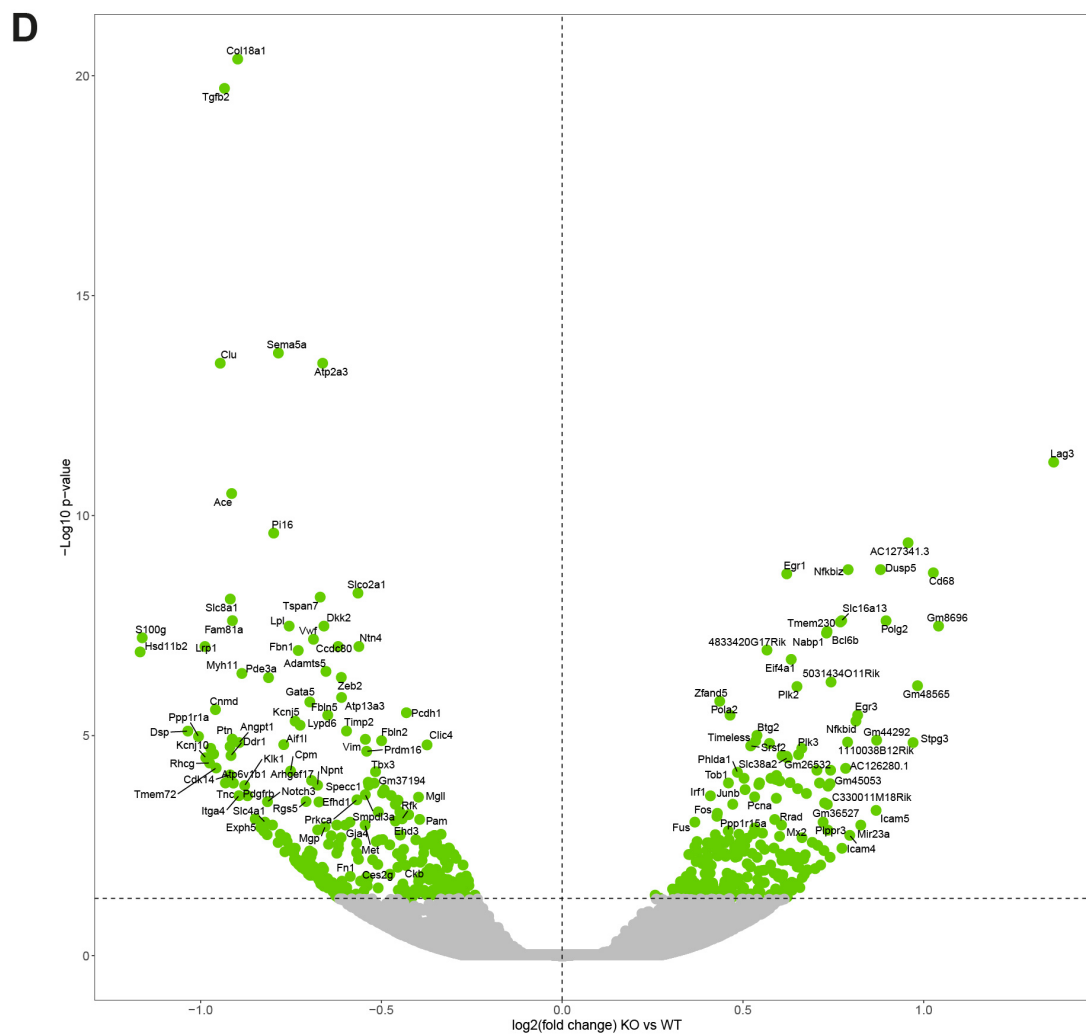

**Supplementary Figure 5:** RNA seq cell-isolation strategy and analysis. **A)** Sketch of EC single cell isolation and enrichment protocol, A, C created with biorender.com. **B)** CD31<sup>+</sup> cell purity after MACS-Sorting (upper panel, input) and after FACS-sorting (lower panel) **C)** From single EC to RNAseq: 2ng of RNA were used for library preparation with the w 'SMARTer Stranded Total RNA-Seq Kit v2 – Pico Input Mammalian' (Takara). Generated libraries were barcoded by dual indexing approach and were finally amplified with 12 cycles of PCR. **D)** Volcano plot showing in green the genes significantly up- or downregulated in *Rbpj*<sup>ΔEC</sup> EC ("KO") as compared to control EC ("WT"), at a threshold of adj. p-value < 0.05 (See methods section and supplementary data file 1,4.)

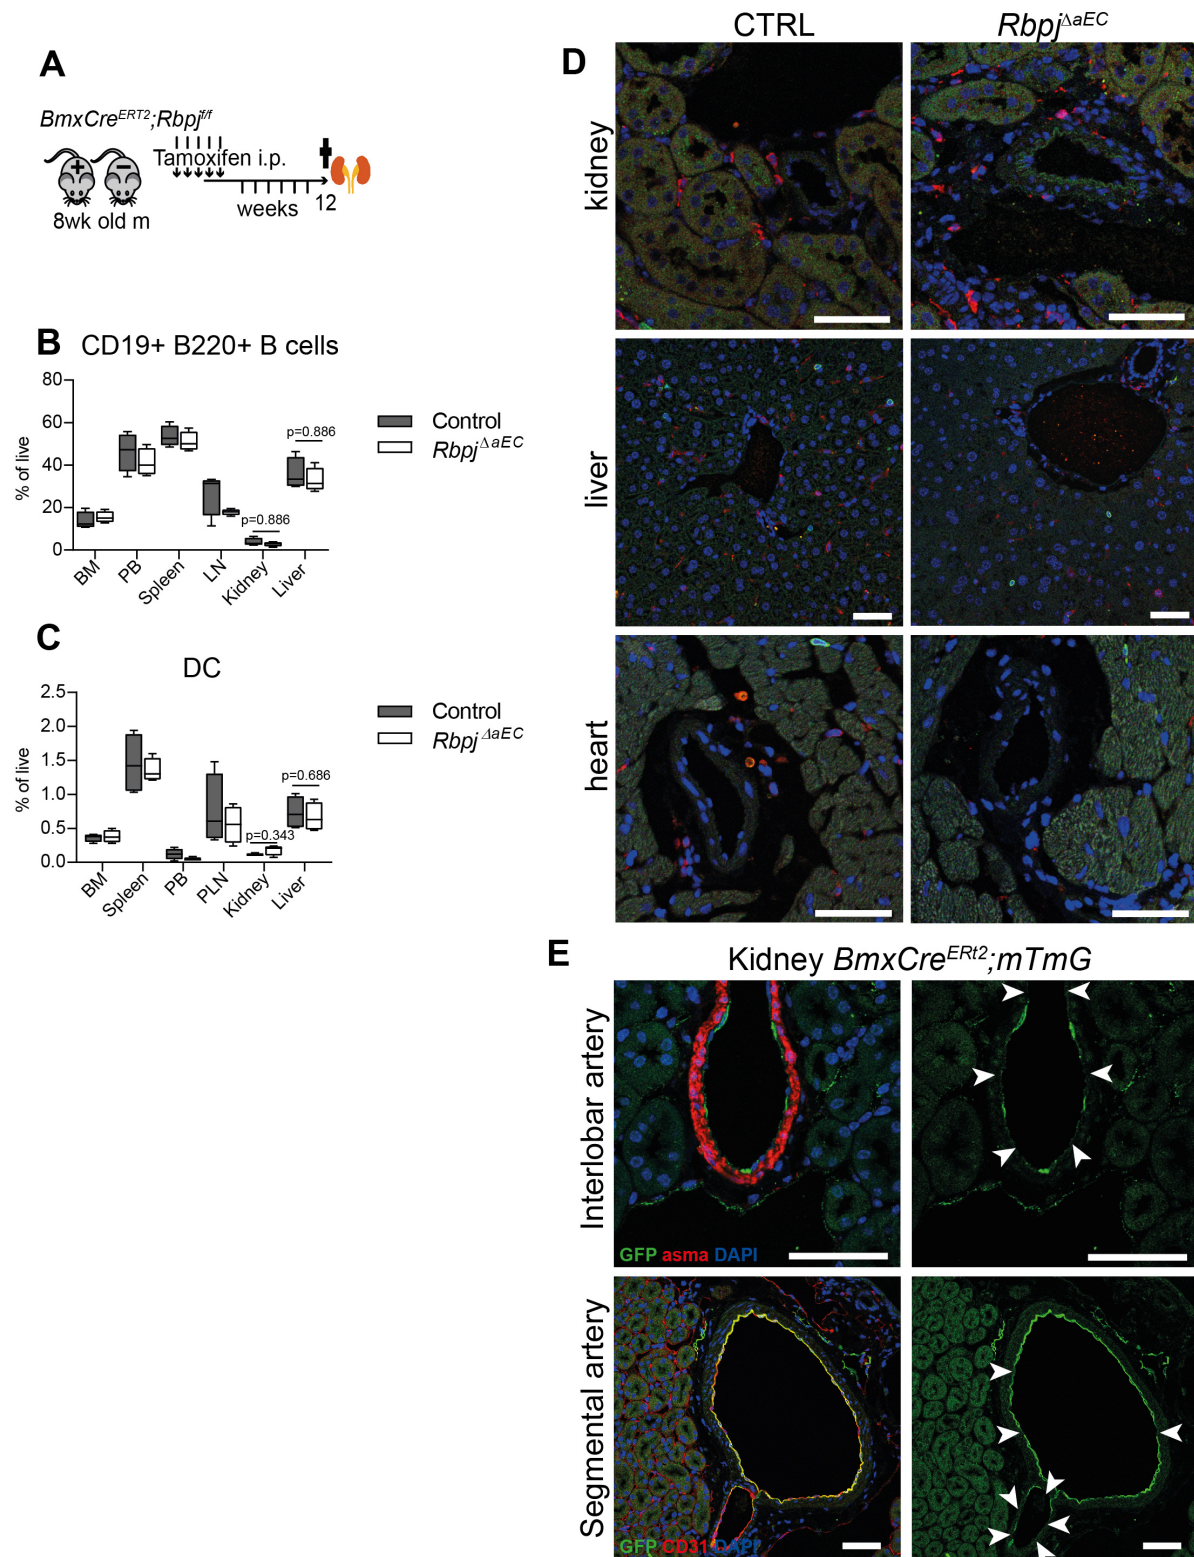

**Supplementary Figure 6: Arterial EC-specific deletion of *Rbpj*.**

**A)** Experimental outline analogous to Fig. 1A. **B)** Flow cytometry of B lymphocytes across bone marrow, blood, spleen, lymph node, kidney and liver from *BmxCre<sup>ERT2</sup>;Rbpj<sup>fl/fl</sup>* mice and Cre-negative littermates. N=4 mice/group. **C)** Flow cytometry of dendritic cells across the same organ panel. N=4 mice/group. B and C: box plots with mean (line), 25-75% (box) and min/max (whiskers). Two-tailed Mann



Whitney test. Source data are provided with this paper. **D)** Immunofluorescence staining of B220 (green) and CD3 (red) in Ctrl and BMX-cre mediated Rbpj knockout, representative images, n= 4 mice/group. **E)** *BMX-Cre<sup>ERT2</sup>;mTmG* recombination control induced in adult age; rehydrated paraffin sections. Several kidney sections from different areas stained from n=2 mice. Green, GFP visualized via anti-GFP-Antibody, shows Cre-mediated recombination. Other channels as indicated. White arrow heads point to non-recombined endothelial cells. All scale bars in D and E, 50µm.

**Supplementary Table 1:** List of antibodies used for flow cytometry.

| Antibody     | Clone       | Label         |        | Company       | Cat. #   |
|--------------|-------------|---------------|--------|---------------|----------|
| CD32/16      | 93          | Unlabeled     | 1:200  | Biolegend     | 101319   |
| CD45         | 30-F11      | AF700         | 1:400  | Biolegend     | 103128   |
| F4/80        | BM8         | APC           | 1:100  | Biolegend     | 123116   |
| CX3CR1       | SA011F11    | PE            | 1:200  | Biolegend     | 149005   |
| CD115        | AFS98       | AF488         | 1:200  | Biolegend     | 135511   |
| CD117        | 2B8         | APC-Cy7       | 1:100  | Biolegend     | 105803   |
| CD19         | 6D5         | Bio           | 1:400  | Biolegend     | 115504   |
| CD19         | 6D5         | PE-Cy7        | 1:400  | Biolegend     | 115519   |
| B220         | RA3-6B2     | Bio           | 1:400  | Biolegend     | 103203   |
| B220         | RA3-6B2     | BV650         | 1:400  | Biolegend     | 103241   |
| CD3          | 17A2        | Bio           | 1:200  | Biolegend     | 100243   |
| CD3          | 17A2        | Pacific Blue  | 1:200  | Biolegend     | 100213   |
| Ter119       | Ter119      | Bio           | 1:400  | Biolegend     | 116203   |
| NK1.1        | PK136       | Bio           | 1:200  | Biolegend     | 108704   |
| NK1.1        | PK136       | PE            | 1:200  | Biolegend     | 108707   |
| Ly6G         | 1A8         | Bio           | 1:400  | Biolegend     | 127603   |
| CD11b        | M1/70       | Pacific Blue  | 1:400  | Biolegend     | 101224   |
| Ly6C         | HK1.4       | PE-Cy7        | 1:1400 | Biolegend     | 128018   |
| I-A/I-E      | M5/114.15.2 | BV510         | 1:400  | Biolegend     | 107635   |
| CD11c        | N418        | BV605         | 1:400  | Biolegend     | 117334   |
| CD31         | 390         | FITC          | 1:100  | Serotec       | MCA1364F |
| CD21/35      | 7E9         | APC-Cy7       | 1:400  | Biolegend     | 123417   |
| CD23         | B3B4        | Pacific Blue  | 1:200  | Biolegend     | 101615   |
| IgM          | RMM-1       | PE            | 1:100  | Biolegend     | 406507   |
| IgD          | 11-26c.2a   | AF647         | 1:400  | Biolegend     | 405707   |
| CD4          | GK1.5       | APC-Cy7       | 1:200  | Biolegend     | 100413   |
| CD8a         | 53-6.7      | BV650         | 1:400  | Biolegend     | 100741   |
| CD43         | S7          | PerCP-Cy5.5   | 1:400  | BD Pharmingen | 562865   |
| CD43         | S11         | PerCP-Cy5.5   | 1:400  | Biolegend     | 143219   |
| CD144        | 11D4.1      | PE            | 1:100  | BD Pharmingen | 562243   |
| Streptavidin |             | PE-Dazzle 594 | 1:400  | Biolegend     | 405247   |

**Supplementary Table 2:** List and sequences of primer pairs used for QPCR.

| Gene name            | Forward-Primer                  | Reverse-Primer                      |
|----------------------|---------------------------------|-------------------------------------|
| <i>Rps9</i>          | GGA TTT CTT GGA GAG GCG GC      | ACC TGC TTG CGG ACC CTA AT          |
| <i>Havcr1 (Kim1)</i> | ATG AAT CAG ATT CAA GTC TTC     | TCT GGT TTG TGA GTC CAT GTG         |
| <i>Cxcl13</i>        | TGA GGC TCA GCA CAG CAA         | ATG GGC TTC CAG AAT ACC G           |
| <i>Cxcl12</i>        | CCA AAC TGT GCC CTT CAG AT      | ATT TCG GGT CAA TGC ACA CT          |
| <i>Cxcr4</i>         | TGG AAC CGA TCA GTG TGA GT      | GGG CAG GAA GAT CCT ATT GA          |
| <i>Cxcr5</i>         | GTG ACC TCT CTC GGC TTC TG      | AGA CTA CTC TTG CGC CAG TTG         |
| <i>Hey1</i>          | GCG CGG ACG AGA ATG GAA AC      | GGC GCT TCT CGA TGA TGC CT          |
| <i>Dll1</i>          | TCC GAT TCC CCT TCG GCT TC      | TGG GTT TTC TGT TGC GAG GT          |
| <i>Dll4</i>          | GGC CGG GAA CCT TCT CAC TC      | TTT CCT GGC GAA GTC TCT GGC         |
| <i>Il7</i>           | TCT GCT GCC TGT CAC ATC ATC     | GGA CAT TGA ATT CTT CAC TGA TAT TCA |
| <i>Jagged1</i>       | CAA ATG AGT GCG AGG CCA AAC CTT | AGC CAG GAA GGC AAT CAC AGT AGT     |
| <i>Notch1</i>        | AGT GTC AGA GGC CAG CAA GAA GAA | TGA TTG TCG TCC ATC AGA GCA CCA     |
| <i>EphrinB2</i>      | TTC TGC TGG ATC AGC CAG GAA TCA | ACC TGG ATT TGG CTT CAC AAA GGG     |
| <i>Vcam1</i>         | TCT TAC CTG TGC GCT GTG AC      | ACT GGA TCT TCA GGG AAT GAG T       |
| <i>Madcam</i>        | TGT CAG ACA CAG GCA CTC CT      | AAG GAA CTC CGG GGA CAC             |
| <i>Sell</i>          | CCA TGG AAC TCA CTG TTG GA      | AAA TCT GTG TAA TTT TGC TTG CAG     |
| <i>Selp</i>          | AAT GCC CCT TGA ACC CTC AC      | GAC CGG GTT TCT TAA GGG GT          |
| <i>Rankl</i>         | GGA TGA AAC AAG CCT TTC AGG     | ACA TCC AAC CAT GAG CCT TC          |
| <i>Ccl21</i>         | TCC AAG GGC TGC AAG AGA         | TGA AGT TCG TGG GGG ATC T           |
| <i>Baff</i>          | CAG GGA CCA GAG GAA ACA GA      | TTT CTG AGG TTC ATT CCA TTA TCA     |
| <i>Ap1nr</i>         | GTG CTC TGG ACC GTG TTT C       | CAC CAC AAA GGT CAA GTC AGC         |
| <i>Nppa</i>          | GCC GGT AGA AGA TGA GGT CA      | GGG CTC CAA TCC TGT CAA TC          |
