# Supplementary material for: Loss of vascular endothelial notch signaling promotes spontaneous formation of tertiary lymphoid structures
Source: PubMed Central journal article supplement (PMC9018798; doi:10.1038/s41467-022-29701-x), 2022-04-19
Supplement: 41467_2022_29701_MOESM3_ESM.pdf [file 41467_2022_29701_MOESM3_ESM.pdf]

## Description of Additional Supplementary files

File name: Supplementary Data 1

Description: Differential gene expression analysis results obtained by using DESeq2 after RNA sequencing of endothelial cells sorted from kidneys of KO (loss-of-function of Rbpj) mice or control (CTRL) mice. Results were not calculated for genes that were not detected at all (0 counts). (Excel Table for download.)

File name: Supplementary Data 2

Description: GSEA results obtained with clusterProfiler of the Gene Ontology terms (with function gseGO, see Methods). For GSEA, the Wald statistics of the genes with mean  $\log_2(\text{normalized counts})$  above 3.23 were used. (Excel Table for download.)

File name: Supplementary Data 3

Description: NES values of GO terms selected for Fig. 5B. (Excel Table for download.)

File name: Supplementary Data 4

Description: Heatmap of EC RNAseq significantly changed genes between groups. (High resolution pdf for download.)

File name: Supplementary Movie 1

Description: Wholmount kidney staining and light sheet imaging of CD31 (red) and B220 (green) of Rbpj $\Delta$ EC kidney as in Fig. 2E; 3D reconstruction and movie with IMARIS software. (see file for download.)

File name: Supplementary Movie 2

Description: Wholmount kidney staining and light sheet imaging of Prox1/Lyve1 (purple) and B220 (green) of Rbpj $\Delta$ EC kidney as in Fig. 3E; 3D reconstruction and movie with IMARIS software. (see file for download.)
