# Supplementary material for: Loss of vascular endothelial notch signaling promotes spontaneous formation of tertiary lymphoid structures
Source: PubMed Central journal article supplement (PMC9018798; doi:10.1038/s41467-022-29701-x), 2022-04-19
Supplement: 41467_2022_29701_MOESM7_ESM.pdf [file 41467_2022_29701_MOESM7_ESM.pdf]

Differentially expressed genes

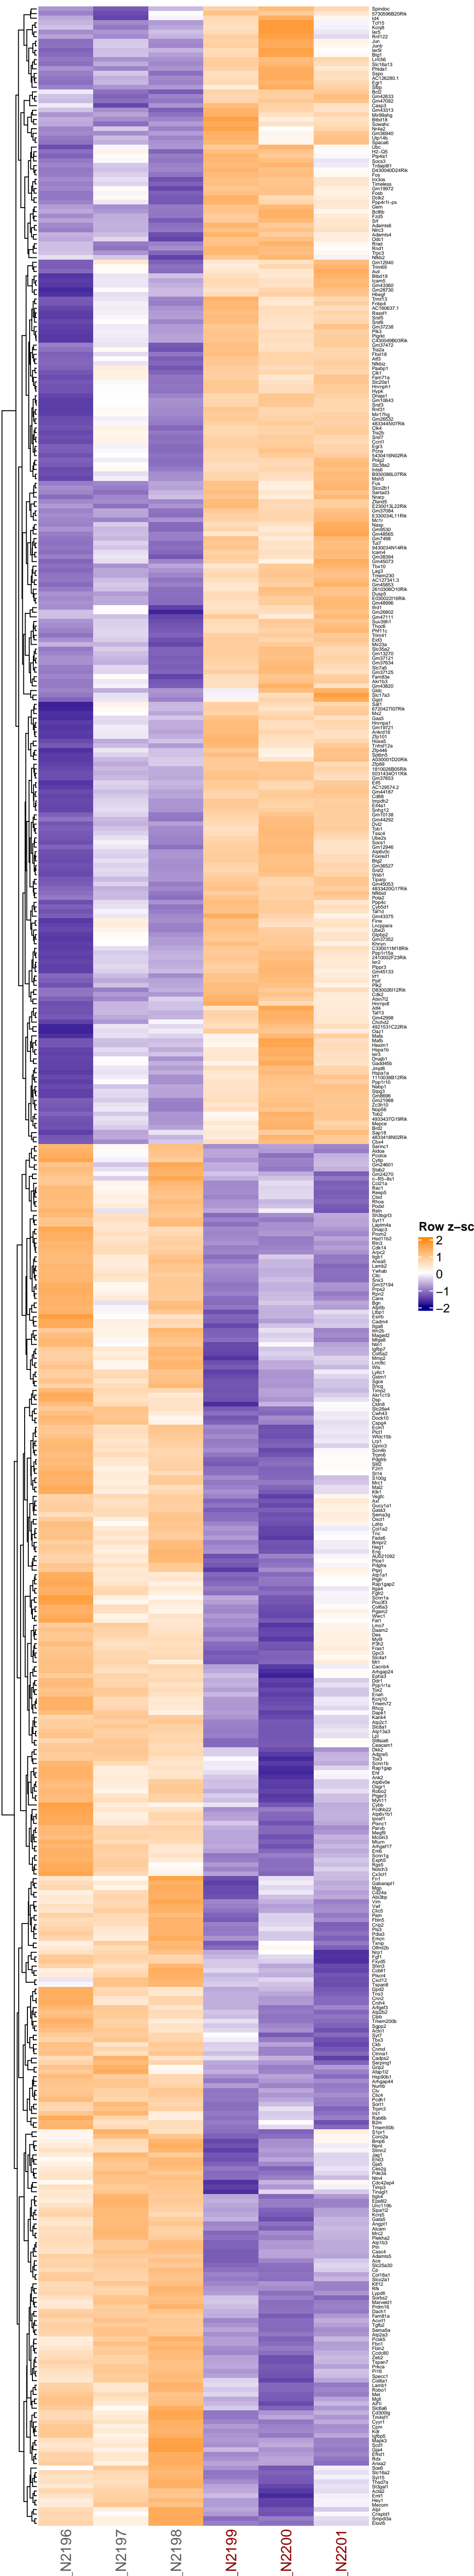

CTRL\_N2196

CTRL\_N2197

CTRL\_N2198

KO\_N2199

KO\_N2200

KO\_N2201

Row z-score

2  
1  
0  
-1  
-2

- Spindoc
- S7149B20Rik
- Irf4
- Kcnj8
- Irf5
- Rfx122
- Jun
- Junb
- Irf4
- Btg1
- Trisf6
- Slc16a13
- Phlda1
- AC126280.1
- Slbp
- Bcl2
- Gm42433
- Gm47092
- Gm43313
- Mir99ahg
- Ebnf1
- Sowahc
- Gm36940
- Utp14b
- Scap5
- Ubc
- H2-Q5
- Socs3
- Tnfrsf11
- D430040D24Rik
- Foxo
- Irf3os
- Timeless
- Gm19572
- Foxb
- Dclk2
- Gm441-ps
- Gem
- Bcl6b
- Fzd5
- Srf
- Adams6
- Nirc3
- Adams4
- Dox10
- Rrad
- Rnc1
- Trpc3
- Nfk2
- Gm12940
- Trim69
- Avil
- Nr2f9
- Icam5
- Gm43360
- Gm28730
- Hbegf
- Trm13
- Fntbp4
- AC108637.1
- Rassf1
- Srsf5
- Srsf6
- Gm37238
- Plk1
- C430049B03Rik
- Gm34772
- Tra2a
- Fbx18
- Fzd5
- Nkx2-1
- Nkx2-2
- Raxbp1
- Cik1
- Fam71a
- Slc22a1
- Hnmp1
- Hyp
- Dnaj1
- Gm10643
- Srsf3
- Rnf31
- Mir7hg
- Scn2b52
- 483445107Rik
- Cik4
- Tra2b
- Srsf7
- Fant1
- Egr3
- Pena
- 5430416N02Rik
- Polg2
- Slc38a2
- Ints6
- 6930086L07Rik
- Mafk
- Fus
- Socs2b1
- Serlad3
- Nrap
- Gm12945
- E230013L22Rik
- Gm37084
- E330034L11Rik
- Mct1r
- Nasos1
- Gm9530
- Gm48565
- Gm7499
- Tut3
- Slc0034N14Rik
- Icam4
- Gm38394
- Gm45073
- Tbx10
- Lag3
- Tmem230
- AC127341.3
- Gm4553
- 2610306O10Rik
- Dusp5
- E33002216Rik
- Gm48996
- Irf1
- Gm26802
- Gm47111
- Suxn1
- Thoc6
- Phf1c
- Trim41
- Eid3
- Slc22a
- Slc35a2
- Gm13270
- Gm37121
- Gm37634
- Slc22a5
- Gm37125
- Fam83a
- Akr1b3
- Gm43820
- Gli3
- Slc17a3
- Sgcl
- Sall1
- 672042707Rik
- Mxd2
- Gas5
- Hnmpa1
- Gm19721
- Ankrd16
- Zfp101
- Hoxa5
- Tnfrsf12a
- Zfp446
- Sptbn5
- A030001D20Rik
- 1810026B05Rik
- 6031434O11Rik
- Gm37653
- Ej5
- AC129574.2
- Gm44187
- Cdk8
- Impgh2
- Eif4a1
- Srsf12
- Gm10138
- Gm4292
- Ovd2
- Tob1
- Tssc4
- Ube2s
- Socs1
- Gm12346
- Atpv0c
- Foxd1
- Btg2
- Gm36527
- Srsf2
- Vsb1
- Tpp1
- Gm48553
- 4833420G17Rik
- Nkx2-3
- Polr2a
- Ppp4c
- Nurs1
- Taf1d
- Gm43375
- Firre
- Lncppara
- Libe3
- Gtpbc2
- Gm37352
- Khrn
- C330011M18Rik
- Ppi115a
- 2410002F23Rik
- Irf2
- Npr3
- Gm45133
- Irf1
- Ppil
- Plk4
- D930026112Rik
- Cdk2
- Abox72
- Hnmpd1
- Aj4
- Taf13
- Gm42998
- Chchd2
- 4831531C22Rik
- Oaz1
- Mat5
- Malb
- Hexm1
- Hgam1b
- Irf3
- Dnaj1
- Gad45b
- Jmjd6
- Hsa1a
- 1110038B12Rik
- Ppp110
- Nab1
- Sip3
- Gm1896
- Gm21988
- Zc3h10
- Nxk5b
- Tob2
- 4833437G19Rik
- Mepce
- Brd2
- Sact1
- 4833418N02Rik
- Cxcl4
- Serinc1
- Aldoa
- Pocla
- Cytp
- Gm24601
- Slc22a
- Gm24270
- Dox10
- Cc21a
- Rac1
- Rac2
- Ctsd
- Risa
- Podxl
- Reln
- Slc16a3
- Syt11
- Lapin4a
- Dnaj3
- Prom2
- Trm11b2
- Rtn3
- Cdk14
- Atp2
- Igf1
- Alox5
- Lamb2
- Ywhab
- Clic4
- Snx3
- Gm37194
- Rpn2
- Srsf1
- Bgn
- Alpb
- Esr1b
- Cadm4
- Igfb8
- Irf2b2
- Miaad2
- Mfge8
- C1orf113
- Igf1p7
- Col5a2
- Mme2
- Lrrc8c
- Wfs
- Ly6c1
- Gstm1
- Srsf10
- Shc3
- Akr1c19
- Dsp
- C1orf113
- Slc26a4
- Cwh43
- Dox10
- Cspg4
- Ecm1
- Pcl1
- Vloc15b
- Lpl
- Gprin3
- Scn4b
- Trpm6
- Pgcfb
- Sif2
- F2r1
- Stt4
- S10a9
- Mrc1
- Matk2
- Kik1
- Veglc
- Aj
- Guyc1a1
- Gata3
- Sema3g
- Oxc1
- Lthb
- Coll2a2
- Tnc
- Fad5
- Bmpr2
- Hes1
- Eng
- AJ021092
- Rfx1
- Pdgfra
- Ppp
- Alp1a1
- Pgfr
- Ran1gap2
- Igfb4
- Fgf2
- Scn11a
- Pou3f3
- Col3a3
- Pgam2
- Vwec1
- Fat1
- Lmo7
- Dam2
- Des
- Myf9
- Fzd2
- Fras1
- Gp2
- Slc4a1
- Mt1
- Caczb4
- Ahrgap24
- Ephr3
- Ddr1
- Ppp11a
- Tox2
- Enah
- Kcnj10
- Tmem72
- Rhoc
- Dap2
- Kar14
- Alp2c1
- Slc3a1
- Atp13a3
- Lpl
- Siba6
- Ceacam1
- Dkk2
- Adgre5
- Tox3
- Scn11b
- Rap1gap
- Ent
- Ank2
- Alpv0e
- Oxcl
- Rob2
- Pgcf3
- Myl11
- Cybb
- Rorb22
- Alpv1b1
- Ipc1
- Pnc1
- Parvb
- Mir122
- Mcoln3
- Murn
- Ahrap17
- Em6
- Scn11g
- Ecm5
- Rgs5
- Nol3
- Cx3cl1
- Fnt1
- Gabarap1
- Mgp
- Cd44
- Abi3bp
- Vim
- Vwh1
- Clic5
- Pann
- Fbln5
- Crip2
- Pdia3
- Emcn
- Tnfr1
- Olfml2b
- Nro1
- Fgf1
- Fxyd5
- Slc18a3
- Cobll1
- Plekh4
- Cxcl12
- Tspan8
- Slc12a2
- Tnfr3
- Cnfr2
- Cnfr3
- Argef3
- Alp2c2
- Clib
- Tmem200b
- Sgrr2
- Actr1
- Cytl1
- Tox3
- Ckb
- Cnnd
- Cnna1
- Capec2
- Serpin1
- Grip2
- Alba12
- Hsp90b1
- Ahrap44
- Nurr1
- Clu
- C1orf113
- Pcdh1
- Sort1
- Tnfr3
- Irs1
- Rorb
- B2m
- Tmem50b
- S1r1
- Coro2a
- Rmp6
- Nrnt
- Slim2
- Igfb1
- Eh3
- Gp2
- Gp29
- Pde3a
- Abox1
- Cdc42ep4
- Timp3
- Tnfr3
- Igf4
- Ephb2
- Unc119b
- Sipa12
- Gata5
- Angpt1
- Alcam
- Mrc2
- Plekh2
- Atp1b3
- Ptn
- Cas4
- Adams5
- Cp
- Col18a1
- Slco2a1
- Rfk2
- Lypd6
- Rorb
- Marveld1
- Pdrn16
- Dact1
- Fam81a
- Acr11
- Tgfb2
- Sema5a
- Fbln2
- Pcsk5
- Ccbe80
- Zellw
- Tspan7
- Pknox1
- P116
- Specc1
- Cobst1
- Lamb1
- Robo1
- Mgl1
- Slc8a6
- Cd300lg
- Tmsf1
- Cypr1
- Cprn
- Kdr
- Igf1p5
- Rarg3
- Scd1
- Gja4
- Ehct1
- Rdx
- Sox6
- Slc6a2
- Srsf15
- Thad7a
- S3gan1
- Acid1
- Emi1
- Hes1
- Mecom
- Alpd1
- Smpd3a
- Ecd5
